# Supplementary material
Source: PubMed Central journal article supplement (PMC4224179)
Supplement: 2ab679f2e37cb023389e702f7a665d48_genetics.114.169243-5.pdf [file 2ab679f2e37cb023389e702f7a665d48_genetics.114.169243-5.pdf]

**Table S3. Primers used for RNA-seq library preparation.**

|                               |                                                                                                 |
|-------------------------------|-------------------------------------------------------------------------------------------------|
| 3' adapter                    | AppAGATCGGAAGAGCACACGTCT/3ddC/                                                                  |
| RT-primer                     | pGATCGTCCGACTGTAGAACTCTGAACCTGTCGGTGGTCGCCGTATCATT/iSp18/<br>GTGACTGGAGTTCAGACGTGTGCTCTTCCGATCT |
| PCR forward                   | AATGATACGGCGACCACCGACAGGTTTCAGAGTTCACAGTCCGACGATC                                               |
| PCR reverse primers (indexed) | CAAGCAGAAGACGGCATAACGAGAT <u>CGTGAT</u> GTGACTGGAGTTCAGACGTGTGCTCTT<br>CCGATCT                  |
|                               | CAAGCAGAAGACGGCATAACGAGAT <u>ACATCG</u> GTGACTGGAGTTCAGACGTGTGCTCTT<br>CCGATCT                  |
|                               | CAAGCAGAAGACGGCATAACGAGAT <u>GCCTAAG</u> GTGACTGGAGTTCAGACGTGTGCTCTT<br>CCGATCT                 |
|                               | CAAGCAGAAGACGGCATAACGAGAT <u>TGGTCA</u> GTGACTGGAGTTCAGACGTGTGCTCTT<br>CCGATCT                  |
|                               | CAAGCAGAAGACGGCATAACGAGAT <u>CACTGT</u> GTGACTGGAGTTCAGACGTGTGCTCTT<br>CCGATCT                  |
|                               | CAAGCAGAAGACGGCATAACGAGAT <u>ATTGGC</u> GTGACTGGAGTTCAGACGTGTGCTCTT<br>CCGATCT                  |
|                               | CAAGCAGAAGACGGCATAACGAGAT <u>GATCTG</u> GTGACTGGAGTTCAGACGTGTGCTCTT<br>CCGATCT                  |
|                               | CAAGCAGAAGACGGCATAACGAGAT <u>TCAAGT</u> GTGACTGGAGTTCAGACGTGTGCTCTT<br>CCGATCT                  |
|                               | CAAGCAGAAGACGGCATAACGAGAT <u>CTGATC</u> GTGACTGGAGTTCAGACGTGTGCTCTT<br>CCGATCT                  |
|                               | CAAGCAGAAGACGGCATAACGAGAT <u>AAGCTA</u> GTGACTGGAGTTCAGACGTGTGCTCTT<br>CCGATCT                  |
|                               | CAAGCAGAAGACGGCATAACGAGAT <u>AAGCTA</u> GTGACTGGAGTTCAGACGTGTGCTCTT<br>CCGATCT                  |
|                               | CAAGCAGAAGACGGCATAACGAGAT <u>TACAAG</u> GTGACTGGAGTTCAGACGTGTGCTCTT<br>CCGATCT                  |
