# Supplementary material
Source: PubMed Central journal article supplement (PMC4224179)
Supplement: 4d2e59d4712b5abf8178f383eb101441_genetics.114.169243-10.pdf [file 4d2e59d4712b5abf8178f383eb101441_genetics.114.169243-10.pdf]

## Figure S6

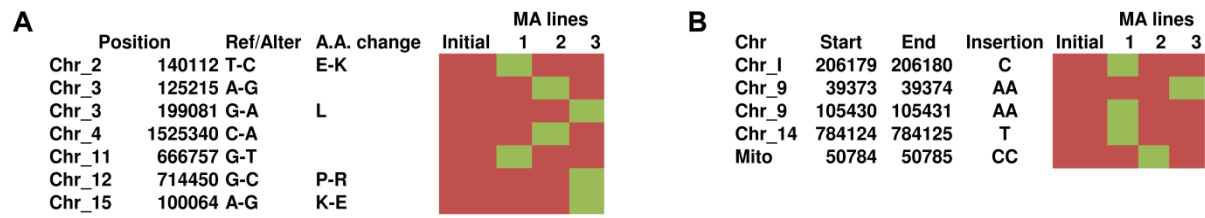

**Figure S6. List of point mutations and indels in Wt MA lines following the long-term growth experiment.** Same representation is shown here for Wt MA lines as in Figure S5.
