# Supplementary material
Source: PubMed Central journal article supplement (PMC4224179)
Supplement: 4dd1ad44a74a812a736c522ea69f6d43_genetics.114.169243-7.pdf [file 4dd1ad44a74a812a736c522ea69f6d43_genetics.114.169243-7.pdf]

**Table S2. Lifespan analysis of MA lines.**

|                | <b>MA-line</b> | <b>MA-line</b> | <b>Initial</b> | <b>Initial</b> | <b>%</b>      | <b>Ranksum</b> |
|----------------|----------------|----------------|----------------|----------------|---------------|----------------|
| <b>MA-line</b> | <b>Mean</b>    | <b>N</b>       | <b>Mean</b>    | <b>N</b>       | <b>Change</b> | <b>P-Value</b> |
| 1              | 4.4            | 20             | 9.2            | 20             | 52.2          | 0.011          |
| 2A             | 7              | 20             | 9.2            | 20             | 23.9          | 0.26           |
| 2B             | 6.9            | 20             | 9.2            | 20             | 25.0          | 0.23           |
| 3              | 6.3            | 20             | 9.2            | 20             | 31.5          | 0.14           |
| 4              | 4.3            | 20             | 9.2            | 20             | 53.3          | 0.011          |
| 5              | 6.4            | 20             | 9.2            | 20             | 30.4          | 0.13           |
| 6              | 6.4            | 20             | 9.2            | 20             | 30.4          | 0.13           |
| Wt-1           | 15.8           | 20             | 20.7           | 20             | 23.7          | 0.11           |
| Wt-2           | 16.6           | 20             | 20.7           | 20             | 19.8          | 0.13           |
| Wt-3           | 19.8           | 20             | 20.7           | 20             | 4.6           | 0.79           |
