# Supplementary material
Source: PubMed Central journal article supplement (PMC4224179)
Supplement: 07a41dd0141e7c86daefb939ab50abc8_genetics.114.169243-1.pdf [file 07a41dd0141e7c86daefb939ab50abc8_genetics.114.169243-1.pdf]

Figure S2

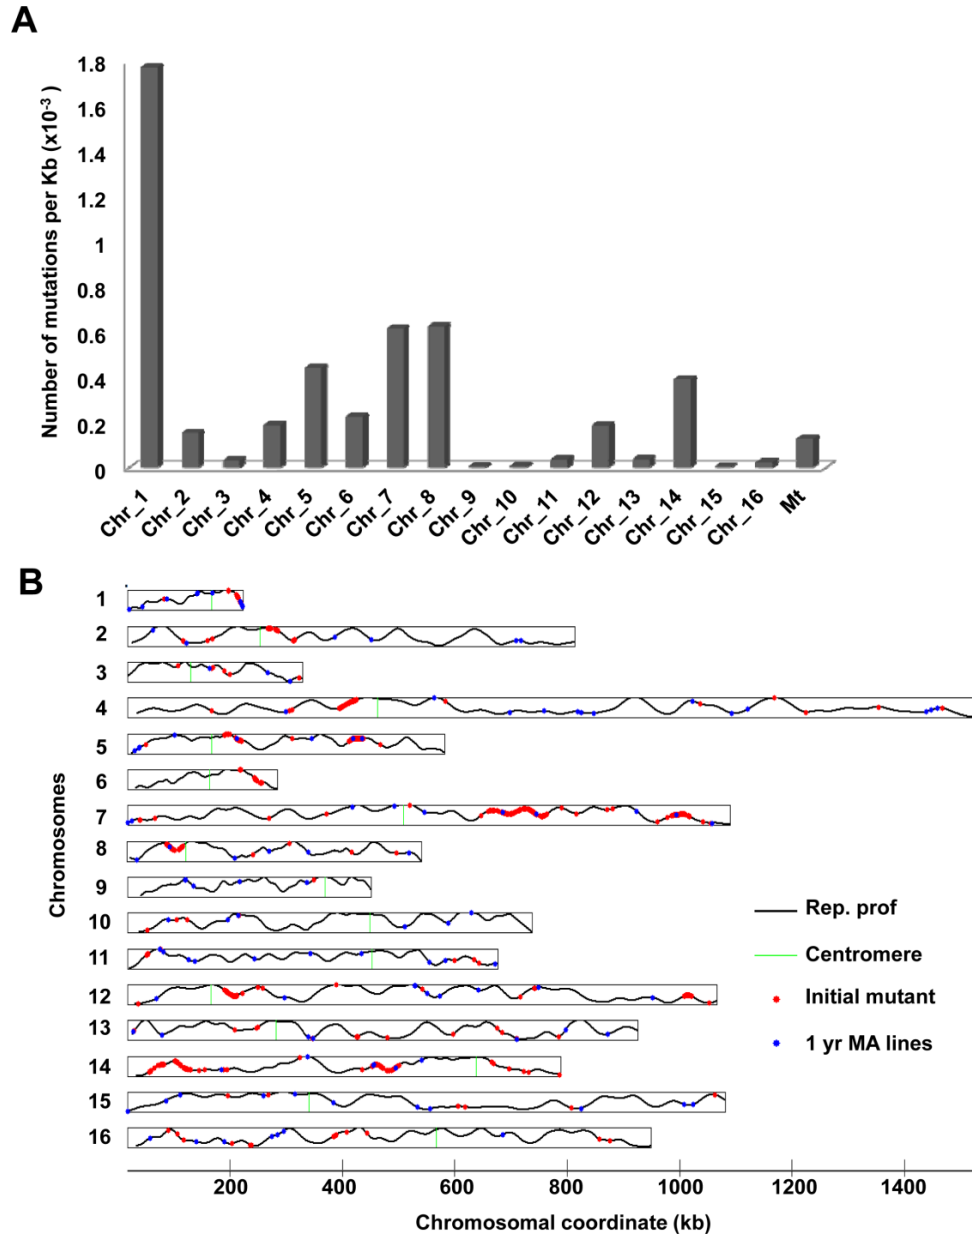

**Figure S2. Chromosome distribution of mutations in the original  $\Delta 8$  strain.** **A)** Number of mutations was normalized according to chromosome length and plotted for each chromosome. **B)** Distribution of initial mutations (red dots) together with mutations identified after the long-term growth (blue dots) per chromosome shown with replication timing (Koren *et al.* 2010).
