# Supplementary material
Source: PubMed Central journal article supplement (PMC4224179)
Supplement: 9a1245a1431e114ce183f12d98d20b1a_genetics.114.169243-2.pdf [file 9a1245a1431e114ce183f12d98d20b1a_genetics.114.169243-2.pdf]

Figure S5

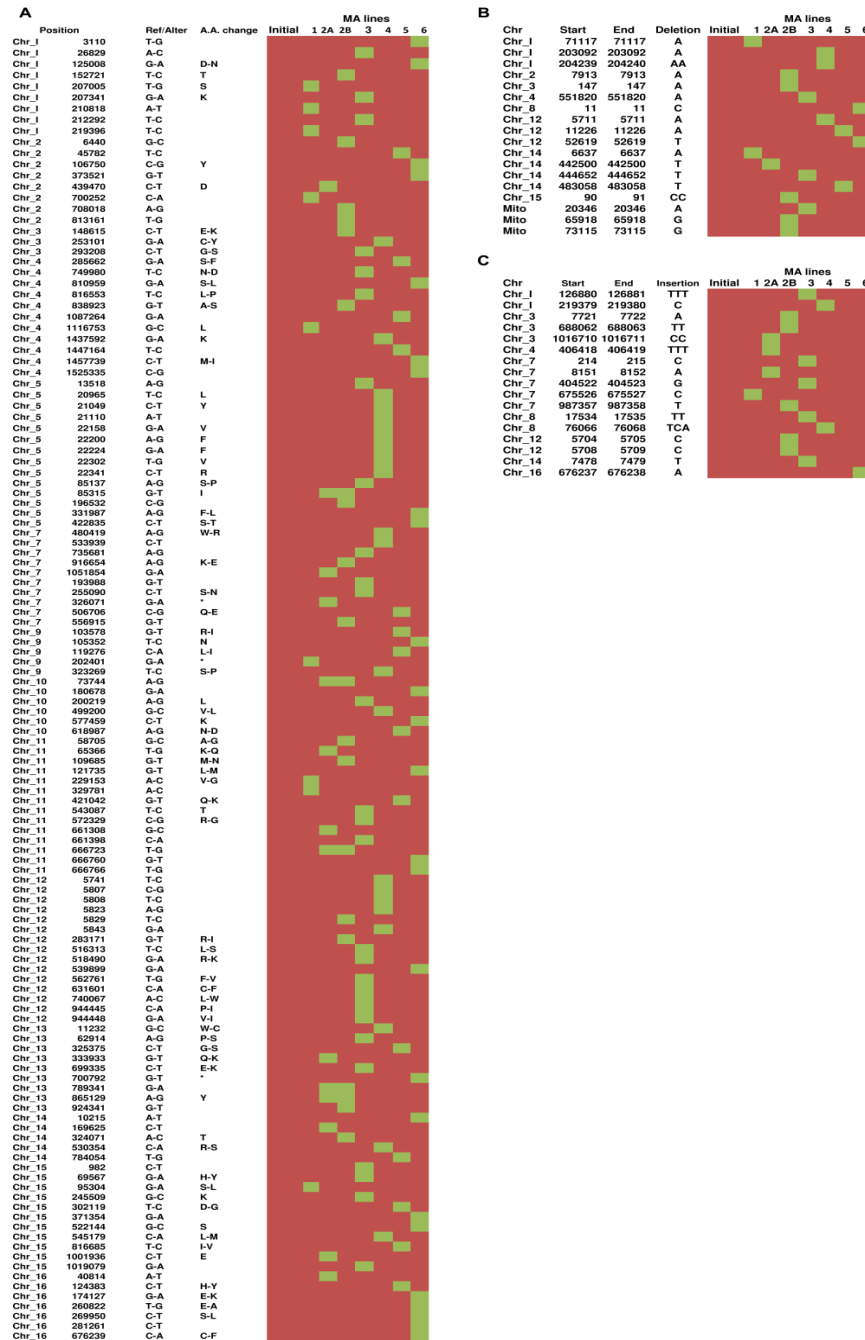

Figure S5. List of point mutations and indels in  $\Delta 8$  MA lines following the long-term growth experiment. Green shows the presence of mutations with positions for each MA line represented by each column. Red shows the absence of mutations for this position for the indicated MA line. **A)** Point mutations. **B)** Deletions. **C)** Insertions.
