# Supplementary material
Source: PubMed Central journal article supplement (PMC4224179)
Supplement: 9173f7392c8578b392863296d1be3f94_genetics.114.169243-9.pdf [file 9173f7392c8578b392863296d1be3f94_genetics.114.169243-9.pdf]

**Table S1. Yeast strains used in this study.**

| <b>Strain</b> | <b>Designation of Wt and mutant cells</b>                     | <b>Genotype</b>                                                                                                                                                                         | <b>Source</b>        |
|---------------|---------------------------------------------------------------|-----------------------------------------------------------------------------------------------------------------------------------------------------------------------------------------|----------------------|
| BY4741        | Wt                                                            | MAT a <i>his3 leu2 met15 ura3</i>                                                                                                                                                       | ATCC                 |
| GY25          | $\Delta 3\text{Gpx}$                                          | MAT a <i>his3 leu2 met15 ura3</i><br><i>\Delta gpx1:URA3, \Delta gpx2:HIS3, \Delta gpx3:KAN</i>                                                                                         | Avery et al., 2001   |
| GY14          | $\Delta 5\text{Prx}$                                          | MATa <i>his3 leu2 met15 ura3</i><br><i>\Delta tsa1:KAN, \Delta tsa2:LEU2, \Delta dot5:MET15, \Delta ahp1:HIS3, \Delta prx1:URA3</i>                                                     | Wong et al., 2004    |
| GY150         | $\Delta 6$ (all $\Delta\text{Prx}$ + $\Delta\text{Gpx1}$ )    | MATa <i>his3 leu2 met15 ura3</i><br><i>\Delta gpx3:KAN, URA3, \Delta tsa1:KAN, \Delta tsa2:LEU2, \Delta dot5:MET15, \Delta ahp1:HIS3, \Delta prx1:URA3</i>                              | This study           |
| GY29          | $\Delta 7$ (all $\Delta\text{Prx}$ +2 $\Delta\text{Gpx1,3}$ ) | MATa <i>his3 leu2 met15 ura3</i><br><i>\Delta gpx1:URA3, \Delta gpx3:KAN, \Delta tsa1:KAN, \Delta tsa2:LEU2, \Delta dot5:MET15, \Delta ahp1:HIS3, \Delta prx1:URA3</i>                  | Fomenko et al., 2011 |
| GY100         | $\Delta 8$ (all $\Delta\text{Prx}$ +all $\Delta\text{Gpx}$ )  | MATa <i>his3 leu2 met15 ura3</i><br><i>\Delta tsa1:KAN, \Delta tsa2:LEU2, \Delta dot5:MET15, \Delta ahp1:HIS3, \Delta prx1:URA3, \Delta gpx2:HYG, \Delta gpx1:URA3, \Delta gpx3:KAN</i> | Fomenko et al., 2011 |
| GY151         | $\Delta 8$ (all $\Delta\text{Prx}$ +all $\Delta\text{Gpx}$ )  | MATa <i>his3 leu2 met15 ura3</i><br><i>\Delta tsa1:KAN, \Delta tsa2:LEU2, \Delta dot5:MET15, \Delta ahp1:HIS3, \Delta prx1:URA3, \Delta gpx2:HYG, \Delta gpx1:NAT, \Delta gpx3:KAN</i>  | This study           |
