# Supplementary material
Source: PubMed Central journal article supplement (PMC4224179)
Supplement: a678039510742ca60fd5ec5f135e775a_genetics.114.169243-13.pdf [file a678039510742ca60fd5ec5f135e775a_genetics.114.169243-13.pdf]

**Figure S3**

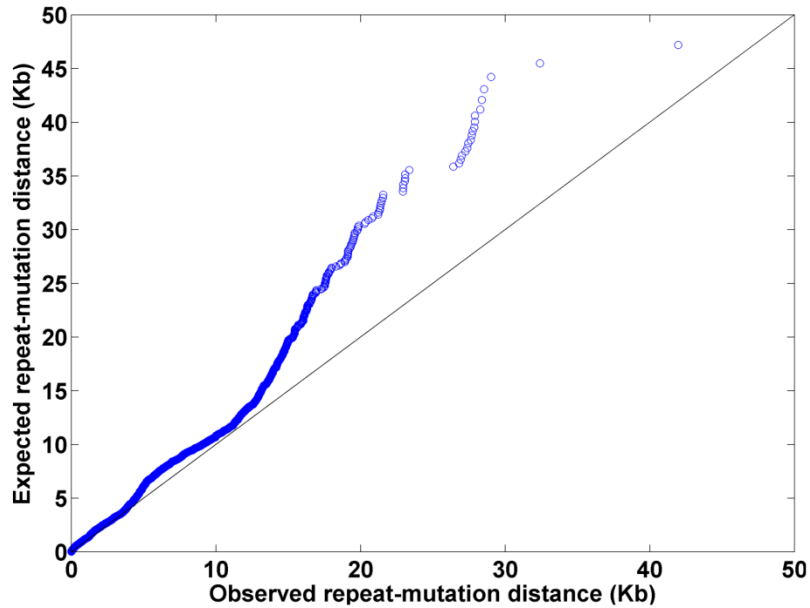

**Figure S3. Observed versus expected distances between repeats and mutations in the initial  $\Delta 8$  strain.** Variable tandem repeats were extracted from Vincens *et al.* 2009 (intergenic repeats) and Verstrepn *et al.* 2005 (intragenic repeats) for our analysis. Blue circles are the observed versus expected distances between mutations in the initial strain and their nearest repeat. The expected distances between mutations and repeats were calculated by averaging over 100 randomized locations of mutations. The diagonal represents equal expected and observed distances. Only repeats of length of 5 bp or more and a repeat number of 3 or more were used for this analysis.
