# Supplementary material
Source: PubMed Central journal article supplement (PMC4224179)
Supplement: d6fefbcd0d7172636688aedc610d43f1_genetics.114.169243-3.pdf [file d6fefbcd0d7172636688aedc610d43f1_genetics.114.169243-3.pdf]

**Figure S7**

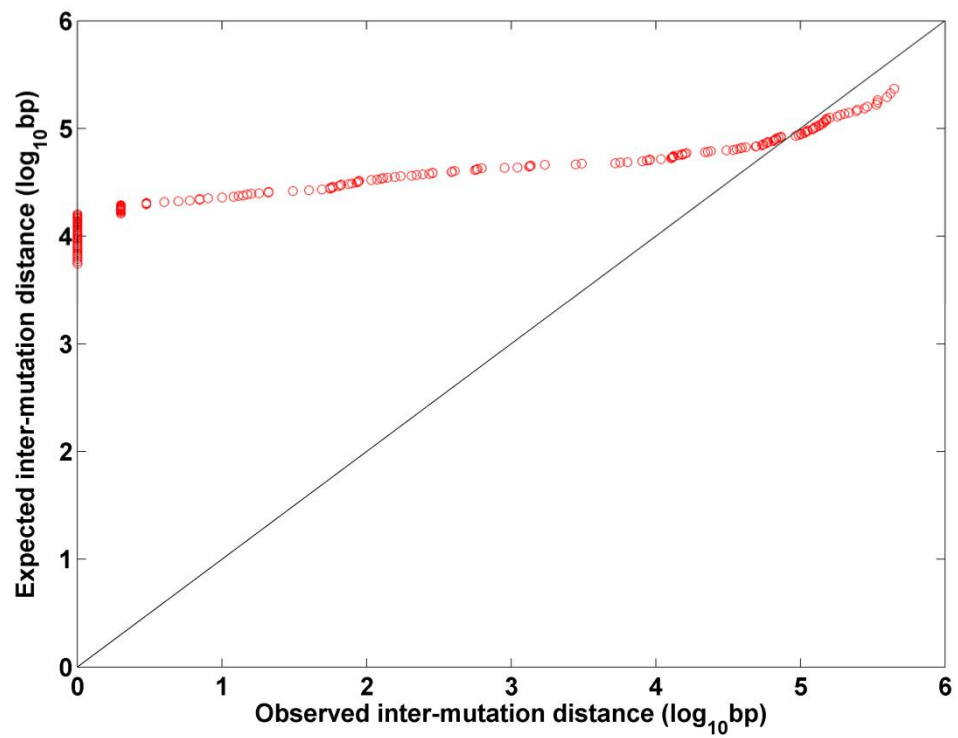

**Figure S7. Clustering mutations in the new  $\Delta 8$  isolate.** Observed versus expected distances between adjacent mutations were analyzed as described in Figure 3B.
