# Supplementary material
Source: PubMed Central journal article supplement (PMC4224179)
Supplement: d416d77f3e451d9e2152846dbff20d79_genetics.114.169243-4.pdf [file d416d77f3e451d9e2152846dbff20d79_genetics.114.169243-4.pdf]

Figure S1

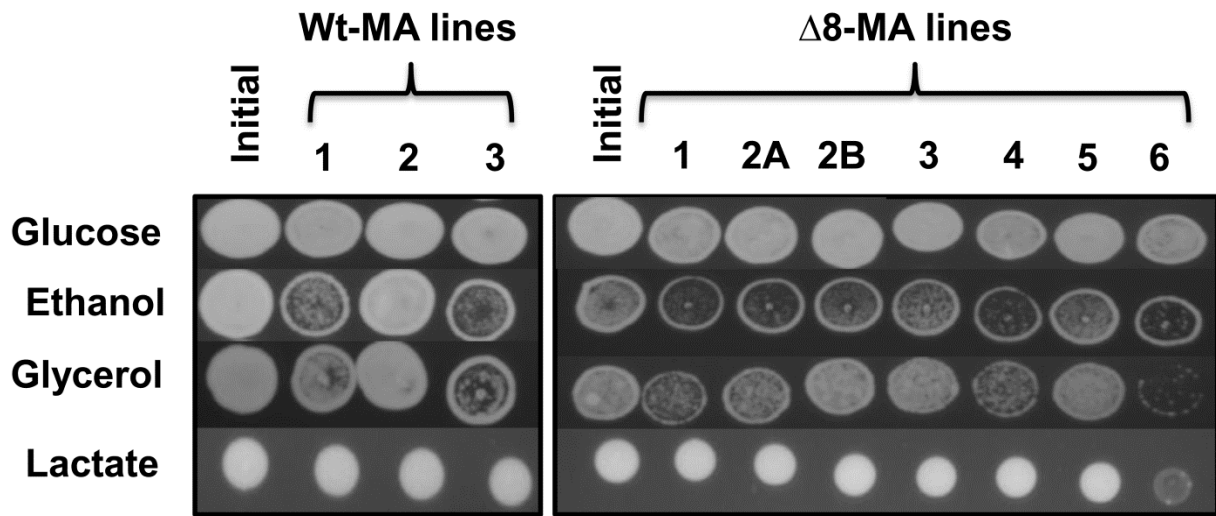

**Figure S1. Spotting assay using respiratory substrates for initial and all MA lines.** Wt and  $\Delta 8$  strains were analyzed on plates containing 2% glucose (Glu), ethanol (EtOH), glycerol (Gly) and lactic acid (Lac), respectively, to analyze the function of mitochondria. Left panel shows the growth of Wt lines and right panel of  $\Delta 8$  lines. All MA lines were able to utilize all respiratory substrates excluding the  $\Delta 8$  MA line 6, which showed poor growth on glycerol and lactic acid plates.
